# Supplementary material for: Frictional properties and microstructural evolution of dry and wet calcite–dolomite gouges
Source: Copernicus journal article supplement (doi:10.5194/se-12-595-2021), 2021-03-05
Supplement: Supplementary file 1 [file se-12-595-2021-supplement.pdf]

Supplement of Solid Earth, 12, 595–612, 2021  
<https://doi.org/10.5194/se-12-595-2021-supplement>  
© Author(s) 2021. This work is distributed under  
the Creative Commons Attribution 4.0 License.

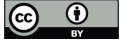

*Supplement of*

## **Frictional properties and microstructural evolution of dry and wet calcite–dolomite gouges**

**Matteo Demurtas et al.**

*Correspondence to:* Matteo Demurtas ([matteo.demurtas@uib.no](mailto:matteo.demurtas@uib.no))

The copyright of individual parts of the supplement might differ from the CC BY 4.0 License.

## Introduction

This file contains (i) an image of the water bath designed to keep gouge samples saturated during slip, and (ii) X-ray powder diffraction (XRPD) analysis of the starting materials, calcite-dolomite mixture batches, and deformed bulk gouge.

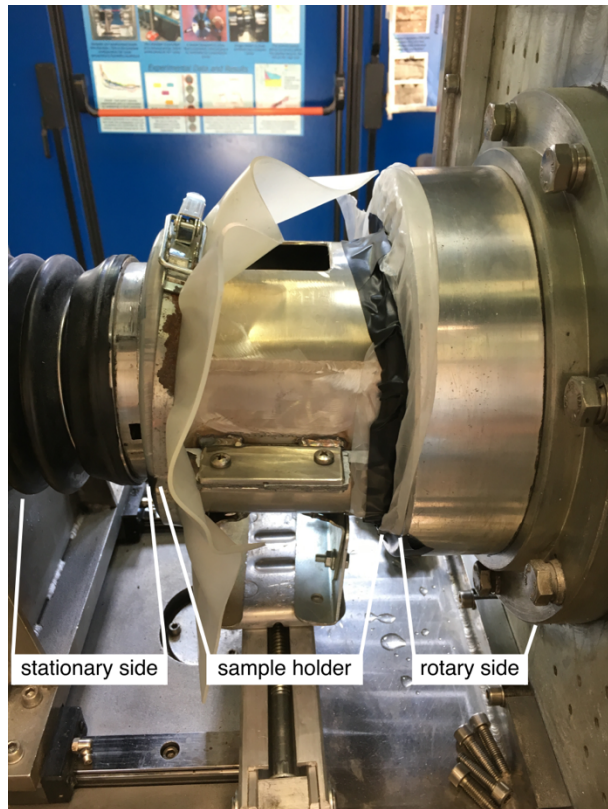

**Figure S1. Photograph of the water bath designed to keep gouges immersed in water during deformation.**

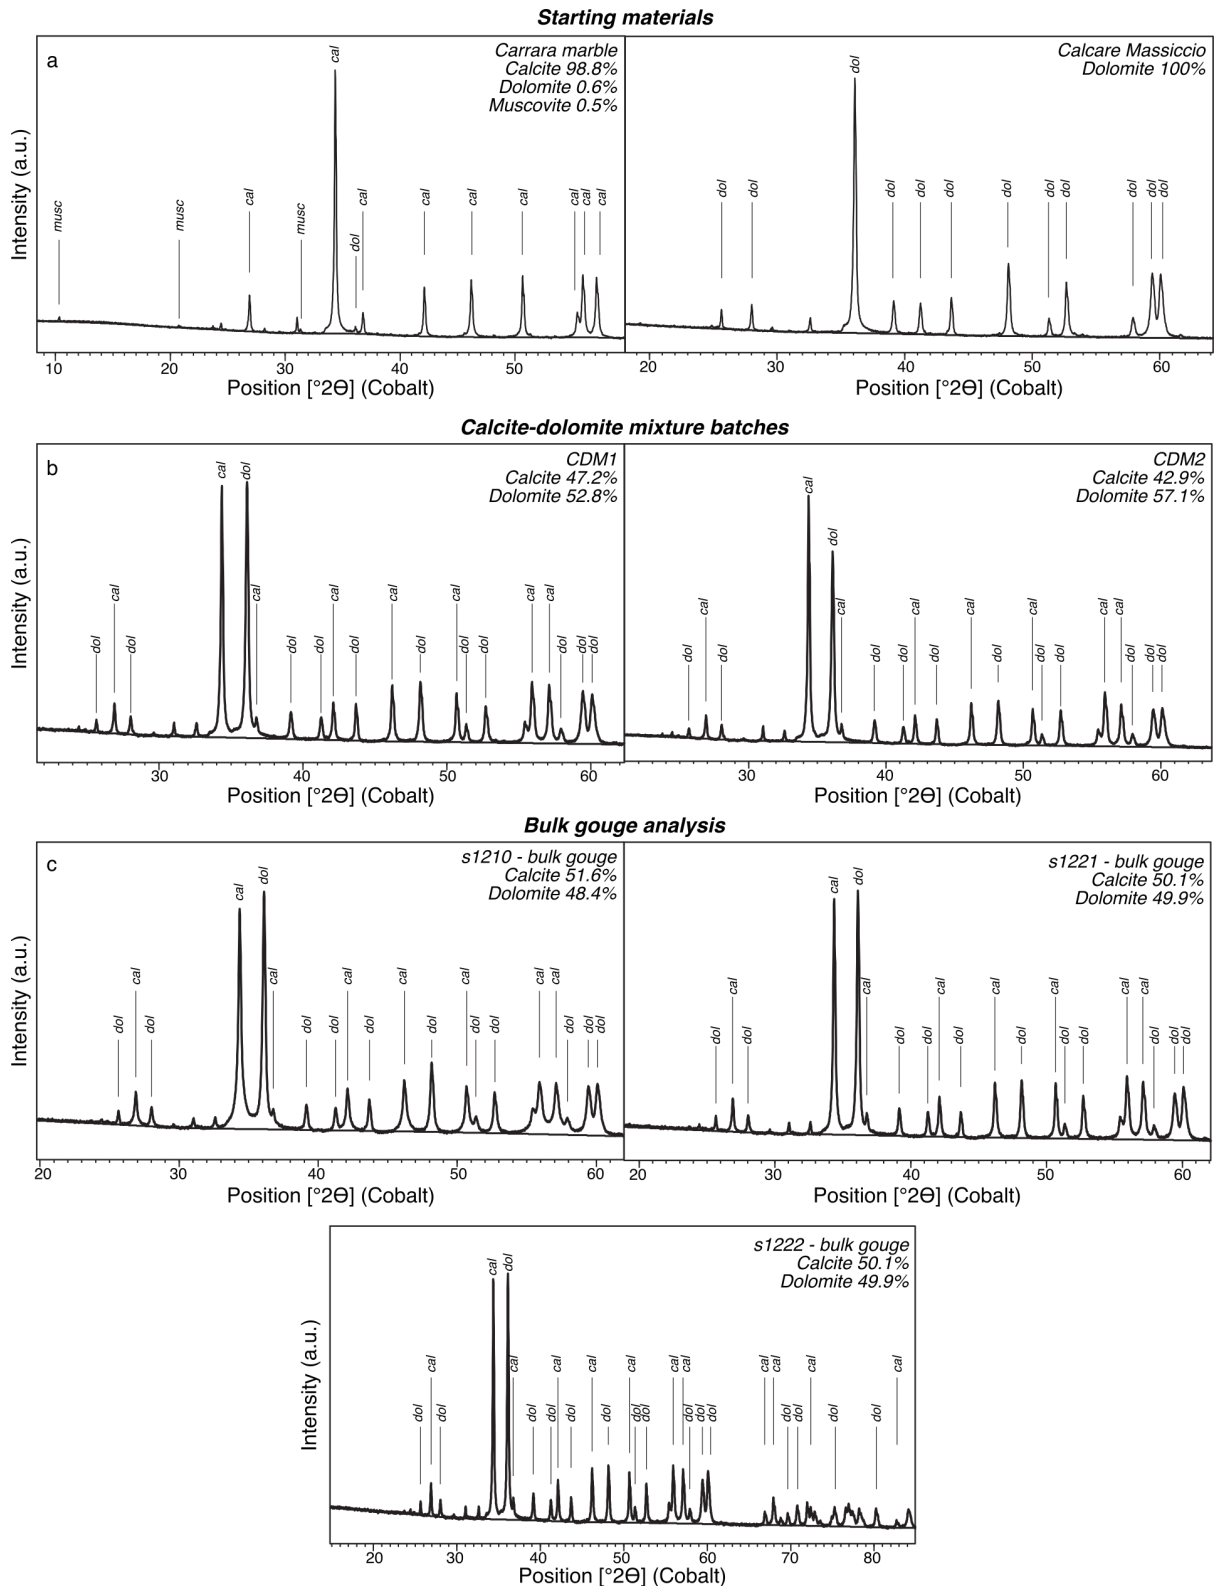

**Figure S2.** XRPD analysis of a) calcite and dolomite used to prepare the gouge mixtures, b) two batches of calcite-dolomite mixtures and c) deformed bulk gouge at different deformation conditions (see Table 1 in the main text for experimental conditions).
